# Supplementary material
Source: PubMed Central journal article supplement (PMC5040353)
Supplement: NIHMS815093-supplement-10.pdf [file NIHMS815093-supplement-10.pdf]

**Table S1. *E. coli* genes with long 5'UTRs responsive to BCM in exponential phase (related to Figure 1).**

**Table S2. Genes upregulated in stationary phase in WT, but not in sRNAs-deficient cells (*dsrA*, *arcZ*, *rprA* triple deletion mutant) (related to Figure 7).**

**Table S3. Templates for in vitro transcription (related to the Methods and Resources section: In vitro Transcription)**

| Name                                                                               | Sequence                                                                                                                                                                                                                                                                                                                                                                                                                                                                                                                                                                                                                                                                                                                                                                                                                                                                                |
|------------------------------------------------------------------------------------|-----------------------------------------------------------------------------------------------------------------------------------------------------------------------------------------------------------------------------------------------------------------------------------------------------------------------------------------------------------------------------------------------------------------------------------------------------------------------------------------------------------------------------------------------------------------------------------------------------------------------------------------------------------------------------------------------------------------------------------------------------------------------------------------------------------------------------------------------------------------------------------------|
| <i>rpoS</i> template with native promoter (1 nt..707 nt, from TSS – shown in bold) | CGACGCAGCAGAGCAAGGAGTTGTGATCAAGCCTGCACAAAATTCCACCGTTGC<br>TGTTGCGTCGCAACCGACAATTACGTATTCTGAGTCTTCGGGTGAACAGAGTGC<br>CTAACAAAATGTTGCCGAACAACAAGCCAACCTGCCACCACGGTCACAGCGC<br>CTGTAACGGTACCAACAGCAAGCACAACCGAGCCGACTGTCAGCAGTACAT<br>CAACCAGTACGCCTATCTCCACCTGGCGCTGGCCGACTGAGGGCAAAGTGA<br>TCGAAACCTTTGGCGCTTCTGAGGGGGGCAACAAGGGGATTGATATCGCAG<br>GCAGCAAAGGACAGGCAATTATCGCGACCGCAGATGGCCCGCTTGTATTAG<br>CTGGTAACGCGCTGCGCGGCTACGGTAATCTGATTATCATCAAACATAATG<br>ATGATTACCTGAGTGCCTACGCCATAACGACACAATGCTGGTCCGGGAAC<br>AACAAGAAGTTAAGCGGGGGCAAAAATAGCGACCATTGGGTAGCACCCGA<br>ACCAGTTCAACACGCTTGCATTTTGAATTCGTTACAAGGGGAAATCCGTAA<br>ACCCGCTGCGTTATTTGCGCAGCGATAAATCGGCGGAACCGGCTTTTGC<br>TTGAATGTTCCGTC AAGGGATCACGGGTAGGAGCCACCTTatgAGTCAGAA<br>ACGCTGAAAGTTCATGATTTAAATGAAGATGCGGAATTTGATGAGAACGGA<br>GTTGAGGTTTTTGACGAAAAGGCCTTAGTAGAACAGGAACCCAGTGATAAC<br>GATTTGGCCGAAGAGGAACTGTTATC |
| <i>csrD</i> template with native promoter                                          | ATGTGCATGATGGATTGGAAAATAATTTCTGAAGACTATACTCGCTAATGGAAA<br>AGCAAAGCCGATGAAGCGCAATAAATTGCGAGATAAATCTGATTGCTAGT<br>ATGCCCGCTTCCTCACTATCGGAGTTAACACAAGGatgAGATTAACGACGAA<br>ATTTTCGGCCTTTGTTACGCTGCTCACC GGGTTAACAAATTTTGTGACTTTG<br>CTGGGCTGTTTCGCTAAGTTTCTACAACGCCATTCAGTATAAGTTTAGTCATC<br>GCGTTCAGGCGGTGGCGACGGCGATTGATACCCACCTTGTGTGCAATGACT<br>TCAGCGTATTAAGGCCACAAATTACCGAATTAATGATGTCGGCAGATACGTT<br>TCGTGTAGACCTGCTCATGGTGATAAACAGGTTTTATACCTGGCCAGAAA<br>TGGTAGTTATCGTCCAGTTGGCTCCAGCGATCTGTTTCGCGAACTGAGCGT<br>TCCGTTGATAAAGCATCCGGGGATGTCGTTGCGTCTGGTTTATCAGGATCC<br>GATGGGCAACTATTTCCATTGCTTATGACCACCGCGCCGCTCACGGGGGC<br>GATTGGCTTATCATTGTTATGCTCTTCTGGCGGTACGCTGGTTACAACGG<br>CAACTTGCCGGGCAAGAATTGCTGGAACCCGGGCTACTCGTATCTTAAAC<br>GGTGAGCGTGGCTCTAATGTGTTGGGAACCATCTATGAATGGCCGCCCA                                                                                        |
| <i>bolA</i> template with native promoter                                          | GAAACACTGATGCGAGGCCCTGTGTTTCAATCTTTAAATCAGTAAACTTCATACG<br>CTTGACGAAAAACCAGGACGAAACCTAAATATTTGTTGTTAAGCTGCAAT<br>GGAAACGGTAAAAGCGGCTAGTATTTAAAGGGATGGATGACATCTCAGCGT<br>TGTCGGAGGAGATATTCatgATGATACGTGAGCGGATAGAAGAAAAATTA<br>GGGCGGCGTTCCAACCCGATTTCTCGAAGTAGTGGATGAAAGCTATCGTC<br>CAAATGTCACCGCGCTCTGAAAGCCATTTTAAAGTTGTGCTGGTCAGCG<br>ATCGTTTTACGGGTGAACGTTTTTCTGAATCGTCATCGAATGATT                                                                                                                                                                                                                                                                                                                                                                                                                                                                                                  |
| <i>dnaQ</i> template with native promoter                                          | GTAGCCAGCGCTAAAGGTTTTCTCGGTCCGCGATAGCGTAAAAATAGCGCCGTA<br>ACCCACAGTCCCTGGATTGCCAGACACGAACCATCGGTGAAAATTTCTAC<br>CTGTTTAAAGCATCTCTGGTAGACTTCCGTGAATTGAATCGAAGCTGAAAACG<br>ACAAGTCTGACATAAATGACCGCTatgAGCACTGCAATTACAGCCAGATCGT<br>TCTCGATACCGAAACCCGGTATGAACCAGATTGGTGGCCTATGAAGG<br>CCACAAGATCATTGAGATTGGTGCCGTTGAAGTGGTGAACCGTCGCTGAC<br>GGGCAATAACTTCCATGTTTATCTCAAACCCGATCGGCTGGTGGATCCGGA<br>AGCCTTTGGCGTACATGGTATTGCCGATGAATTTTTGCTCGATAAGCCACG<br>TTTGCCGAAGTAGCCGATGAGTTCATGACTATATTCCGGCGCGGAGTTG<br>GTGATCCATAACGCAGCGTTCGATATCGGCTTTATGGAAGTACAGATTTTTCGT<br>TGCTTAAAGCGGATATTCCGAAGACCAATACTTTCTGTAAGGTACCCAGTAG<br>CCTTGCGGTGGCGAGGAAAATGTTTCCCGGTAAGCGCAACAGCCTCGATGC<br>GTTATGTGCTCGCTACGAAATAGATAACAGTAAACGAACGCTGCACGGGGC<br>ATTACTCGATGCCAGATC                                                                                                                         |
| T7_DsrA (T7 promoter is underlined)                                                | <u>TAATACGACTCACTATA</u> AGGAACACATCAGATTTCCCTGGTGTAACGAATTTTTAA<br>GTGCTTCTTGCTTAAGCAAGTTTCATCCCGACCCCTCAGGGTCGGGATT                                                                                                                                                                                                                                                                                                                                                                                                                                                                                                                                                                                                                                                                                                                                                                   |
| T7_RprA                                                                            | <u>TAATACGACTCACTATA</u> AGGACGGTTATAAATCAACATATTGATTTATAAGCATGG<br>AAATCCCCTGAGTGAACAACGAATTGCTGTGTGTAGTCTTTGCCCATCTCCCAC<br>GATGGGCTTTTTTT                                                                                                                                                                                                                                                                                                                                                                                                                                                                                                                                                                                                                                                                                                                                            |
| T7_ArcZ                                                                            | <u>TAATACGACTCACTATA</u> AGGGTGCGGCCTGAAAAACAGTGCTGTGCCCTTGTAAC<br>TCATCAATAAATTTACGGCGCAGCAAGATTTCCCTGGTGTGGCGCAGTATTC<br>GCGCACCCCGGCTAGCCGGGTCATTTTT                                                                                                                                                                                                                                                                                                                                                                                                                                                                                                                                                                                                                                                                                                                                 |

|         |                                                                                                                                            |
|---------|--------------------------------------------------------------------------------------------------------------------------------------------|
| T7_OxyS | TAATACGACTCACTATAGGGAAACGGAGCGGCACCTCTTTTAACCCCTGAAGTC<br>ACTGCCCCGTTTCGAGAGTTTCTCAACTCGAATAACTAAAGCCAACGTGAACTTTT<br>GCGGATCTCCAGGATCCGCT |
|---------|--------------------------------------------------------------------------------------------------------------------------------------------|

**Table S4. List of RT-qPCR primers (related to the Methods and Resources section: RT-qPCR)**

| Primer name    | Sequence                 |
|----------------|--------------------------|
| nlpD check_FW  | GCTCAGCGCAACAATATTCAG    |
| nlpD check_RV  | GCATTTCCGCCAGTGATTG      |
| rpoS: UTR_FW   | GATGATTACCTGAGTGCCTACG   |
| rpoS: UTR_RV   | GCTACCCATGGTCGCTATTT     |
| rpoS: 5'ORF_FW | GAAGATGCGGAATTTGATGAGAAC |
| rpoS: 5'ORF_RV | AGTTCCTCTTCGGCCAAATC     |
| rpoS: ORF_FW   | ACCCGTAATTCGTTTGCC       |
| rpoS: ORF_RV   | ATCTCTTCCGCACTTGGTTC     |
| fadE_FW        | TCACATTCGCCGTCAGTTC      |
| fadE_RV        | GCATCCATCACGTAGGCATTA    |
| yqcE_FW        | GCTTCCTCATGCGTCTCTTA     |
| yqcE_RV        | CAATCGCTTCTGGCGTAAATC    |
| astE_FW        | TGACCAGGGCAAAGAATCTG     |
| astE_RV        | ATGTCGCGTTGCGGTAATA      |
| napF_FW        | GCTGCGACGCTGTATTA        |
| napF_RV        | ACAGAAGCTGCACTCGTTATT    |
| gapA_FW        | GCACCACCAACTGCCTGGCT     |
| gapA_RV        | CGCCGCGCCAGTCTTTGTGA     |
| lacZ_FW        | AGCGCGATCCCGTCGTTTTACA   |
| lacZ_RV        | CAGGCTGCGCAACTGTTGGG     |
| GFP_FW         | TGGAGAGGGTGAAGGTGAT      |
| GFP_RV         | AGCATTGAACACCATAAGTCAAAG |

**Table S5. 5'UTR fragments of BCM-insensitive genes tested in GFP reporter assay (related to the Methods and Resources section: Protein Reporter Assays and Figure S3)**

| Name | Sequence                                                                                                                          |
|------|-----------------------------------------------------------------------------------------------------------------------------------|
| csrD | ATGGAAAAGCAAAGCCGATGAAGCGCAATAAATTGCGAGATAAATCTGAT<br>TTGCTAGTATGCCCGCTTCTCACTATCGGAGTT                                           |
| bolA | CGCTTGACGGAAAAACCAGGACGAAACCTAAATATTTGTTGTTAAGCTGC<br>AATGGAAACGGTAAAAGCGGCTAGTATTTAAAGGGATGGATGACATCTCA<br>GCGT                  |
| dnaQ | GCCGTAACCCCCAGGTCCTGGATTGCCAGACACGAACCATCGGTGAAAA<br>TTTCTACCTGTTTAAGCATCTCTGGTAGACTTCTGTAATTGAATCGAACTG<br>TAAAACGACAAGTCTGACATA |
