# Supplementary material
Source: PubMed Central journal article supplement (PMC5040353)

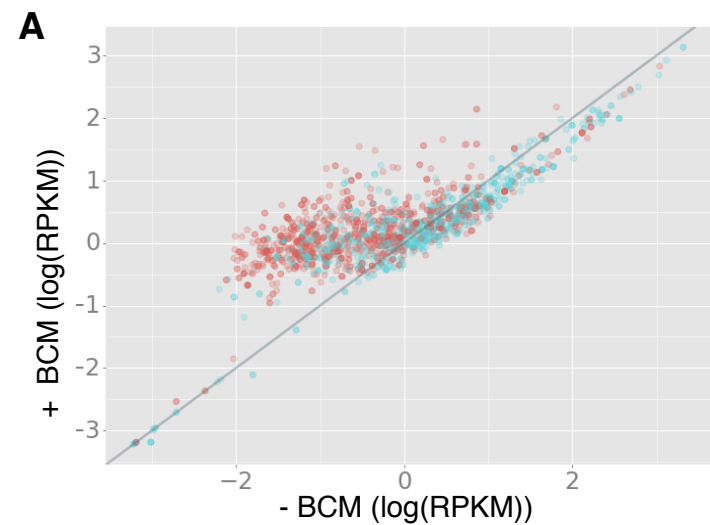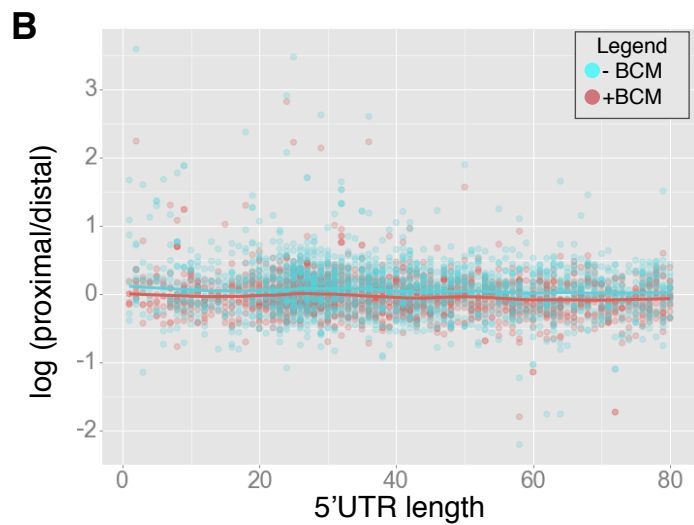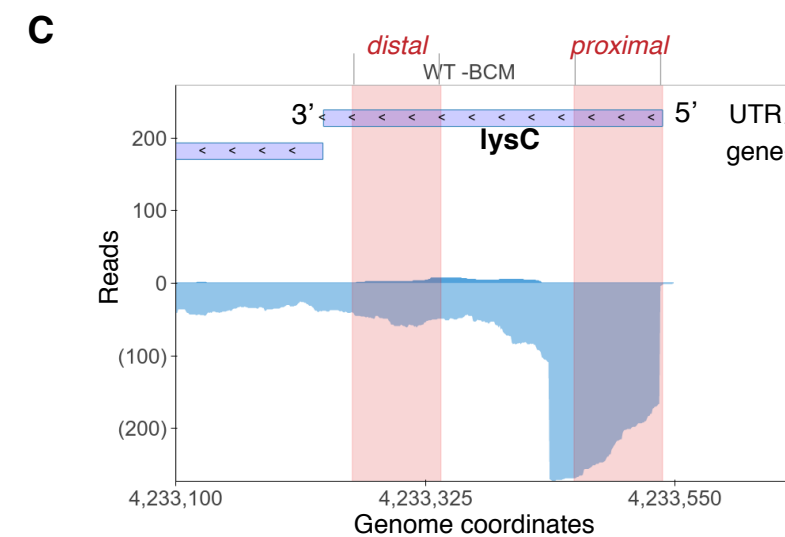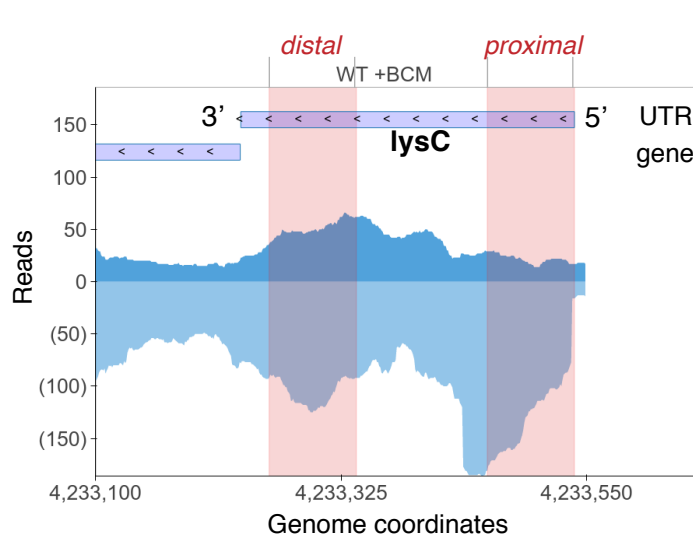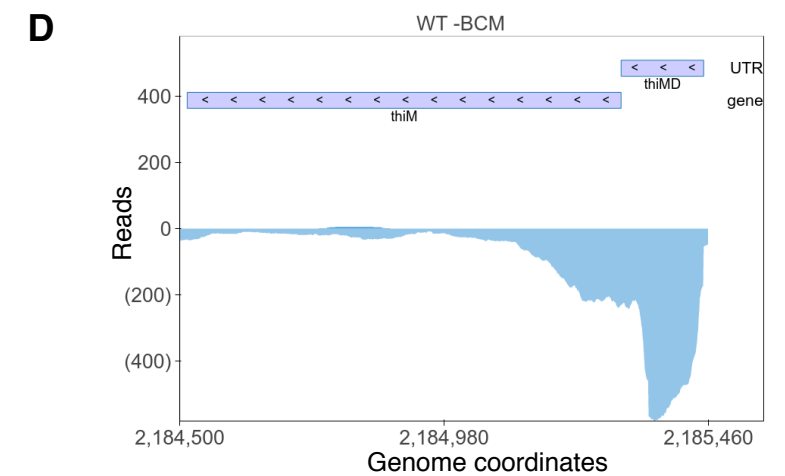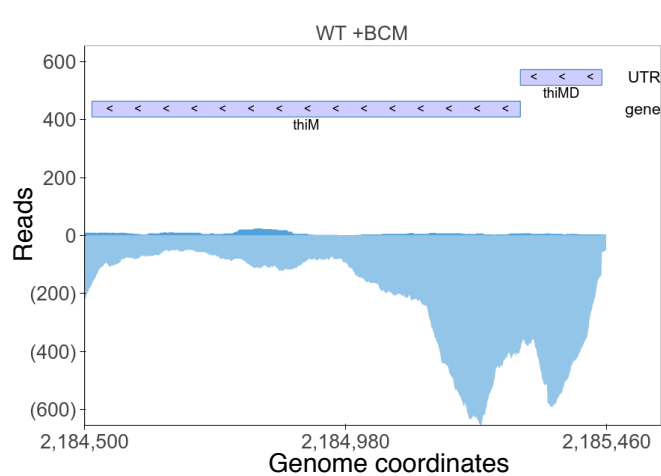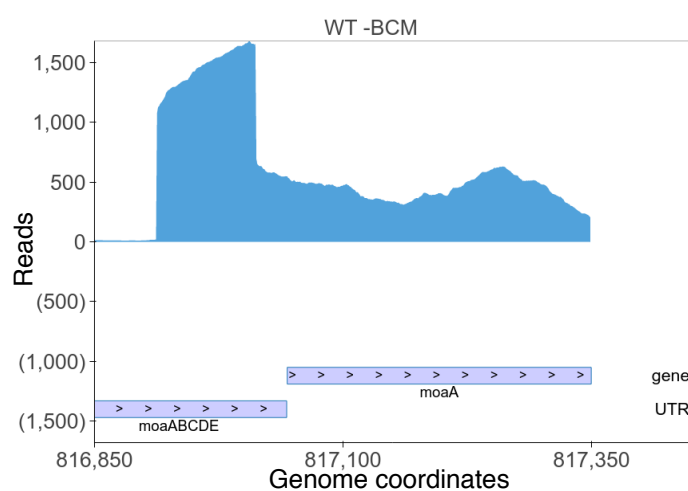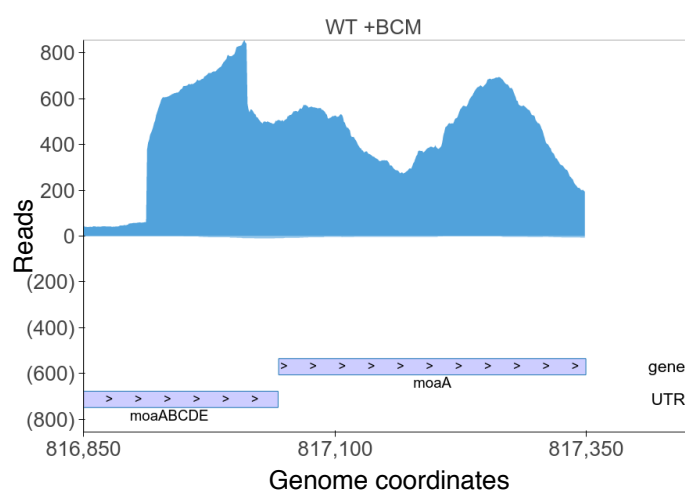

Supplement: NIHMS815093-supplement-1.pdf [file NIHMS815093-supplement-1.pdf]

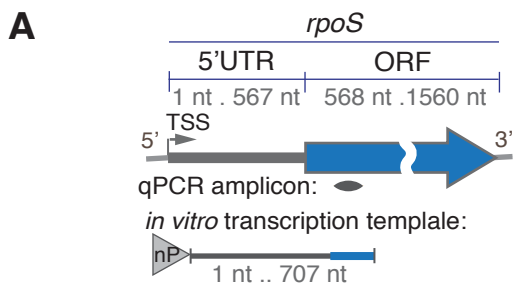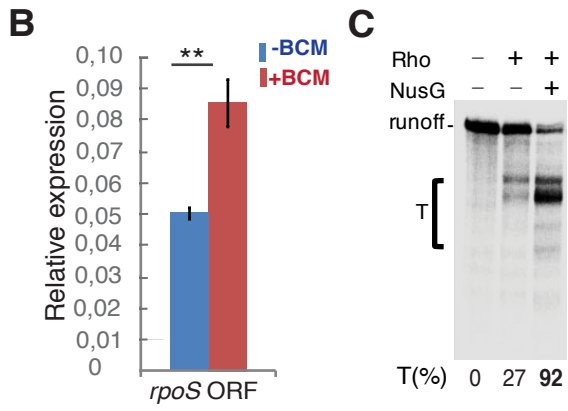

Supplement: NIHMS815093-supplement-2.pdf [file NIHMS815093-supplement-2.pdf]

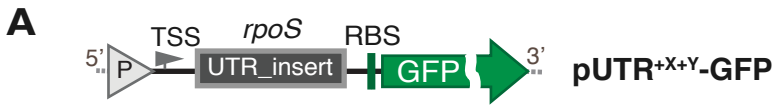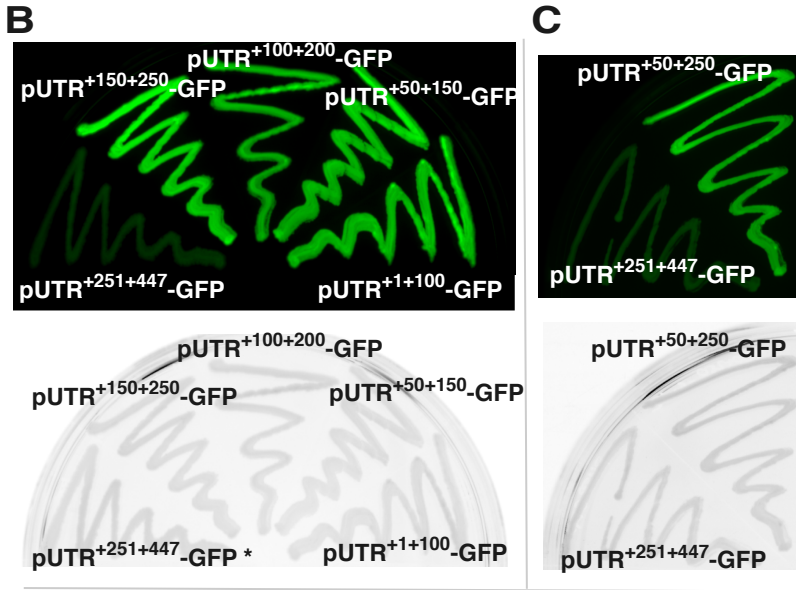

\* pUTR<sup>+251+447</sup>-GFP = pUTR<sup>S</sup>-GFP

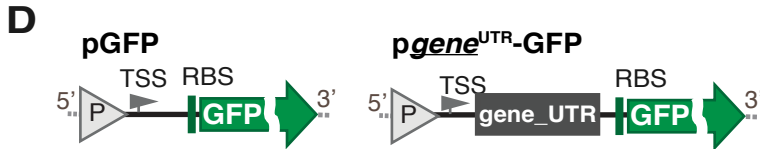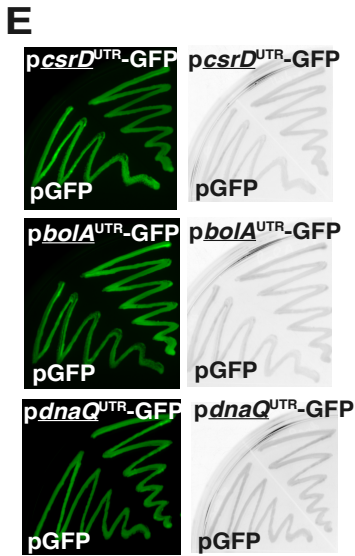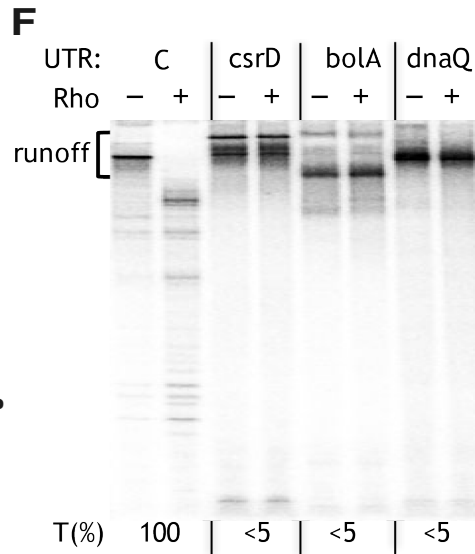

Supplement: NIHMS815093-supplement-3.pdf [file NIHMS815093-supplement-3.pdf]

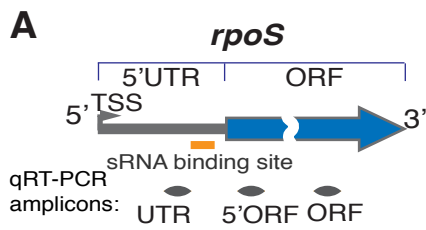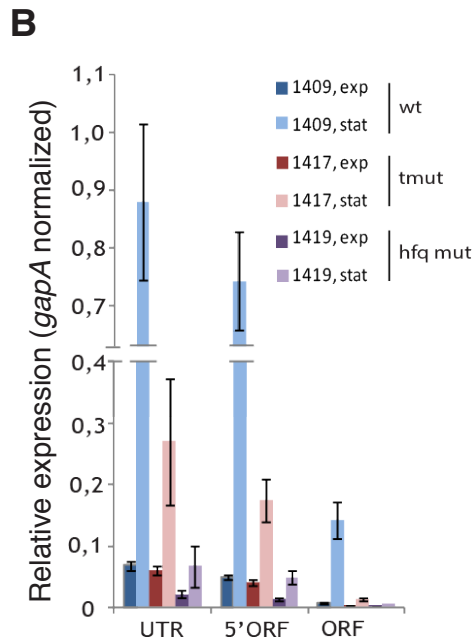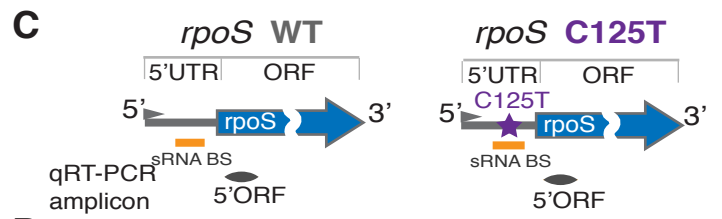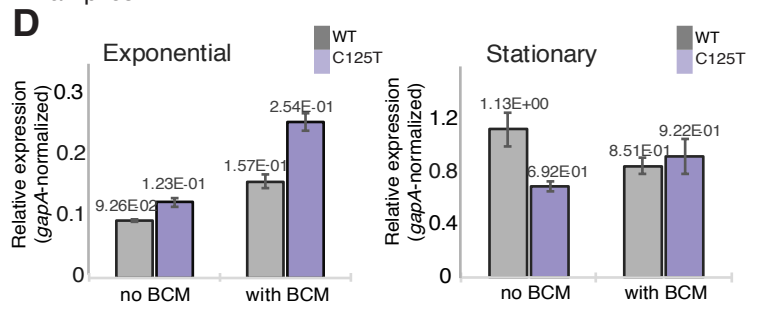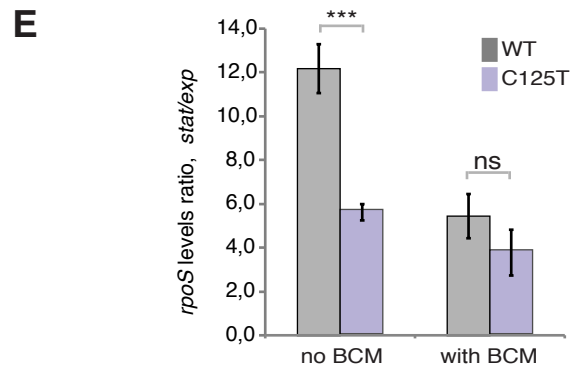

Supplement: NIHMS815093-supplement-5.pdf [file NIHMS815093-supplement-5.pdf]

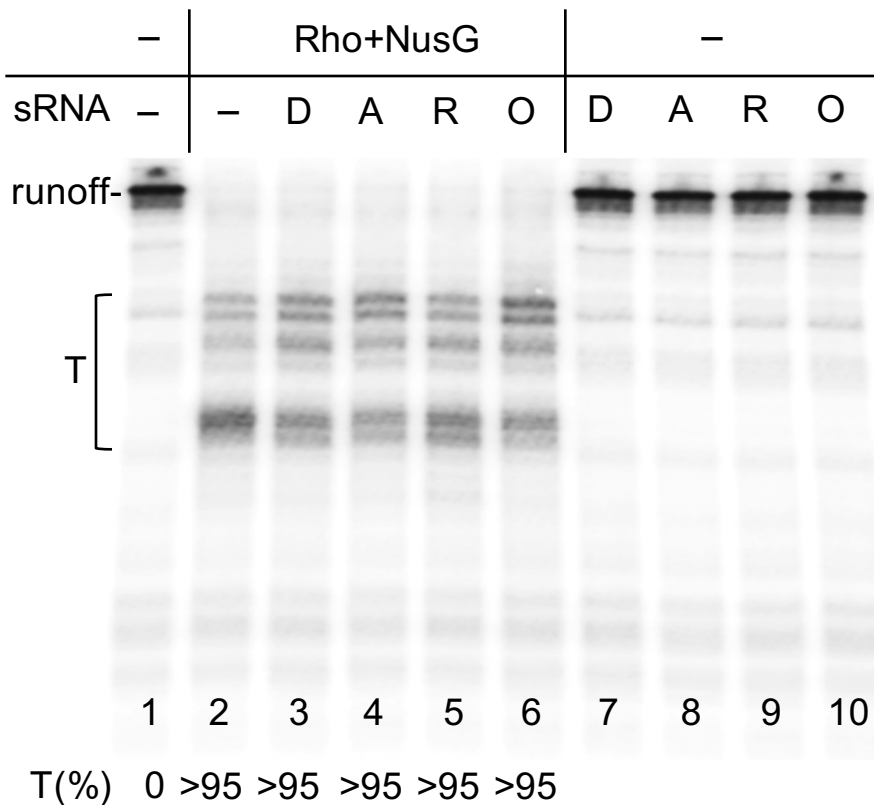

Supplement: NIHMS815093-supplement-6.pdf [file NIHMS815093-supplement-6.pdf]

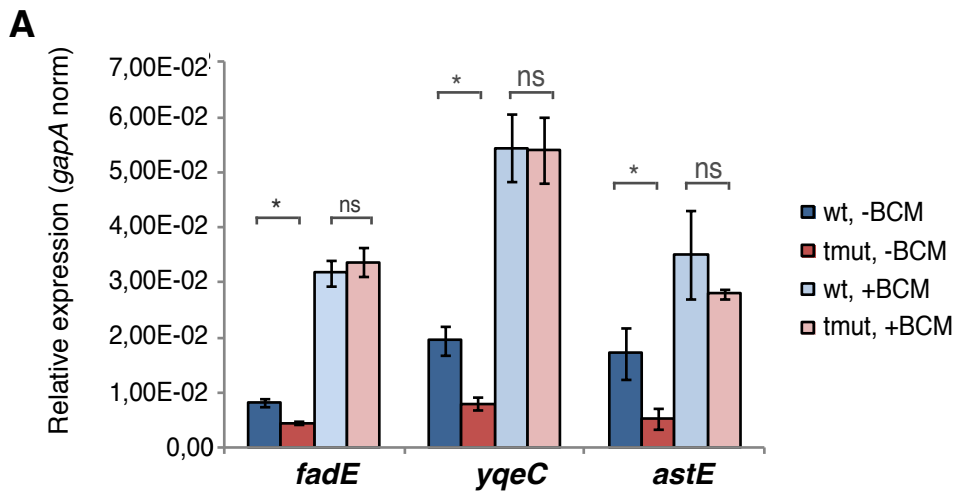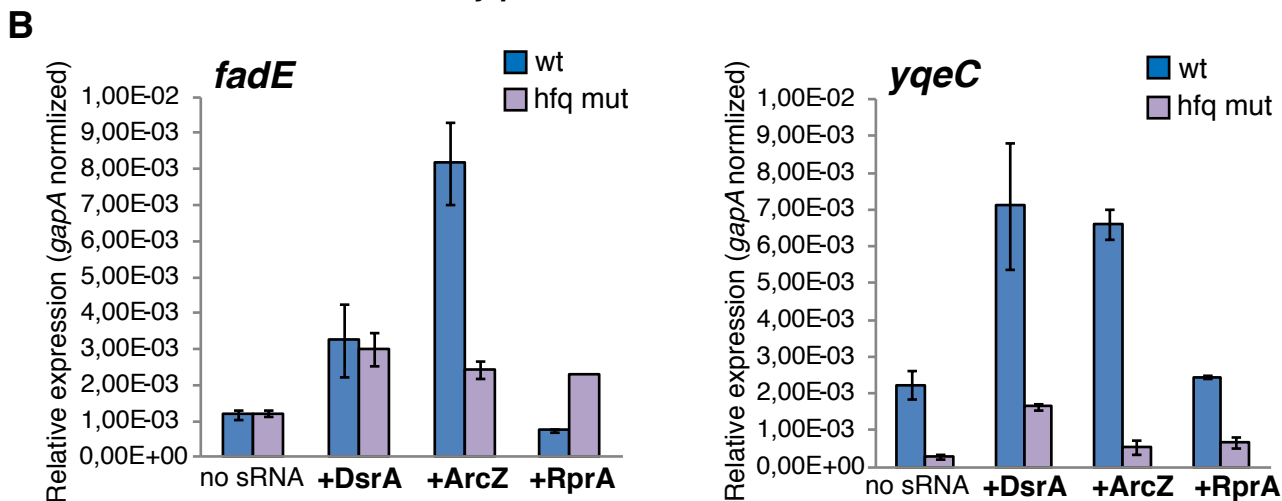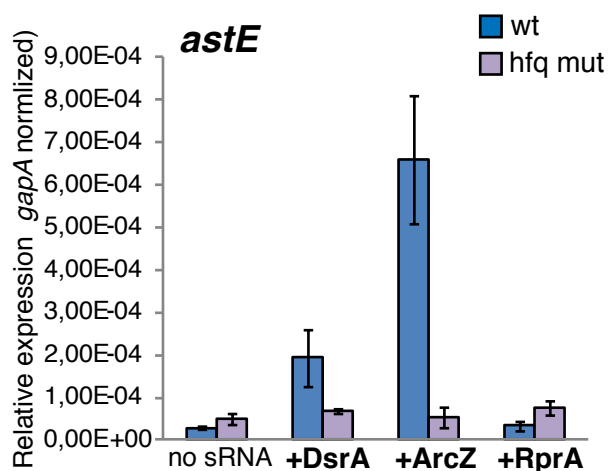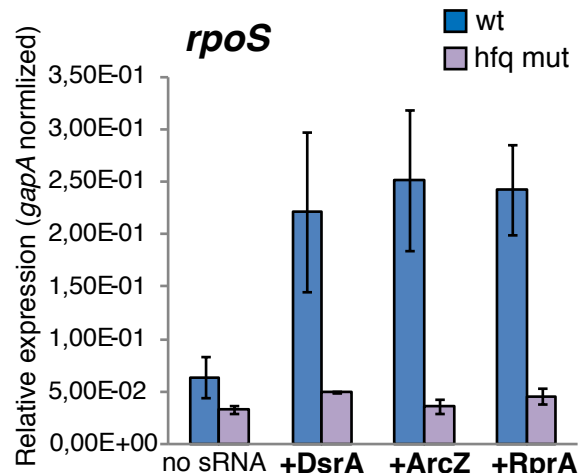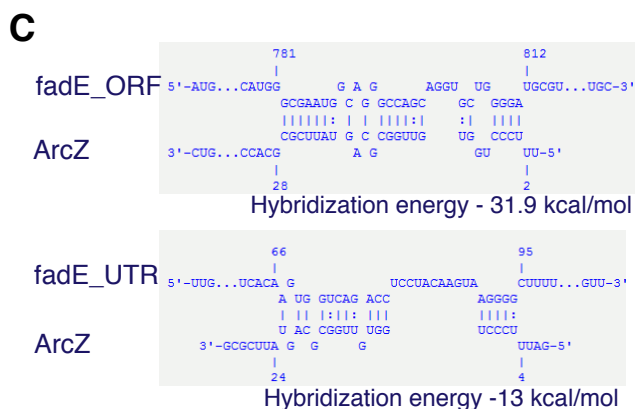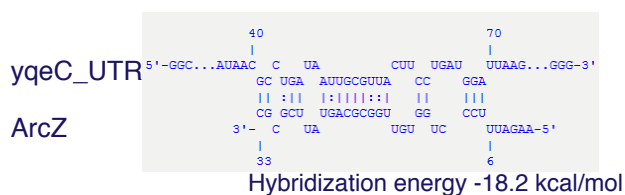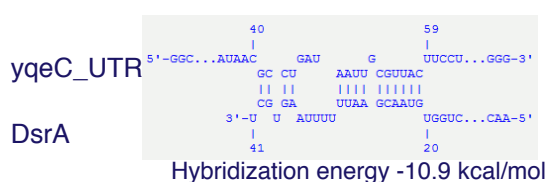

Supplement: NIHMS815093-supplement-7.pdf [file NIHMS815093-supplement-7.pdf]
